# Supplementary material for: Stroke Lesion Segmentation and Deep Learning: A Comprehensive Review
Source: MDPI journal article supplement (doi:10.3390/bioengineering11010086), 2024-01-17
Supplement: s1 [file s1]

Table S1. Quality Assessment of all the articles included in the literature.

| Reference | Q1 | Q2 | Q3 | Q4 | Q5 | Q6 | Q7 | Q8 | Q9 | Q10 | Total |
|-----------|----|----|----|----|----|----|----|----|----|-----|-------|
| [12]      | 1  | 1  | 1  | 1  | 1  | 1  | 1  | 0  | 0  | 0   | 7     |
| [64]      | 1  | 1  | 1  | 1  | 1  | 1  | 1  | 0  | 0  | 0   | 7     |
| [76]      | 1  | 1  | 1  | 0  | 1  | 0  | 1  | 0  | 0  | 1   | 6     |
| [33]      | 1  | 1  | 1  | 1  | 1  | 0  | 0  | 1  | 0  | 1   | 7     |
| [65]      | 1  | 1  | 1  | 0  | 1  | 1  | 0  | 1  | 0  | 0   | 6     |
| [41]      | 1  | 1  | 1  | 0  | 1  | 1  | 1  | 0  | 0  | 0   | 6     |
| [42]      | 1  | 1  | 1  | 0  | 1  | 0  | 1  | 1  | 0  | 0   | 6     |
| [71]      | 1  | 1  | 1  | 1  | 1  | 1  | 1  | 1  | 0  | 0   | 8     |
| [56]      | 0  | 1  | 1  | 1  | 1  | 1  | 0  | 0  | 0  | 1   | 6     |
| [77]      | 1  | 1  | 1  | 0  | 1  | 1  | 1  | 0  | 0  | 0   | 6     |
| [73]      | 1  | 1  | 1  | 0  | 1  | 1  | 1  | 0  | 0  | 0   | 6     |
| [55]      | 1  | 1  | 1  | 1  | 1  | 1  | 1  | 0  | 0  | 1   | 8     |
| [54]      | 1  | 1  | 1  | 1  | 1  | 0  | 0  | 0  | 0  | 0   | 5     |
| [78]      | 1  | 0  | 1  | 1  | 1  | 1  | 1  | 0  | 0  | 0   | 6     |
| [34]      | 1  | 1  | 1  | 1  | 1  | 1  | 1  | 1  | 0  | 0   | 8     |
| [40]      | 1  | 1  | 1  | 1  | 1  | 1  | 1  | 0  | 0  | 0   | 7     |
| [35]      | 1  | 1  | 1  | 1  | 1  | 1  | 1  | 0  | 0  | 0   | 7     |
| [66]      | 1  | 1  | 1  | 1  | 1  | 1  | 1  | 1  | 0  | 0   | 8     |
| [13]      | 0  | 1  | 0  | 1  | 1  | 0  | 1  | 0  | 0  | 0   | 4     |
| [79]      | 1  | 1  | 1  | 1  | 1  | 1  | 1  | 1  | 0  | 0   | 8     |
| [52]      | 0  | 0  | 0  | 1  | 0  | 1  | 1  | 0  | 0  | 0   | 3     |
| [80]      | 1  | 1  | 0  | 0  | 1  | 0  | 1  | 0  | 0  | 1   | 5     |
| [68]      | 1  | 1  | 0  | 0  | 1  | 1  | 1  | 0  | 0  | 1   | 6     |

|         |      |      |      |      |      |      |      |      |   |      |      |
|---------|------|------|------|------|------|------|------|------|---|------|------|
| [53]    | 1    | 1    | 0    | 1    | 1    | 1    | 1    | 0    | 0 | 0    | 6    |
| [86]    | 1    | 1    | 0    | 0    | 1    | 1    | 1    | 0    | 0 | 0    | 5    |
| [89]    | 0    | 1    | 1    | 0    | 1    | 1    | 0    | 0    | 0 | 0    | 4    |
| [91]    | 1    | 1    | 1    | 0    | 1    | 0    | 1    | 0    | 0 | 0    | 5    |
| [90]    | 1    | 1    | 0    | 0    | 1    | 0    | 1    | 0    | 0 | 0    | 4    |
| Average | 0.86 | 0.93 | 0.75 | 0.57 | 0.96 | 0.71 | 0.82 | 0.25 | 0 | 0.21 | 6.07 |

## References:

- [12] Zhang, X.; Xu, H.; Liu, Y.; Liao, J.; Cai, G.; Su, J.; Song, Y. A Multiple Encoders Network for Stroke Lesion Segmentation. In Proceedings of the Chinese Conference on Pattern Recognition and Computer Vision (PRCV), Virtual Conference, 29 October–1 November 2021; Springer International Publishing: Cham, Switzerland, 2021; 524–535.
- [13] Li, C. Stroke Lesion Segmentation with Visual Cortex Anatomy Alike Neural Nets. *arXiv* **2021**, arXiv:2105.06544.
- [33] Clèrigues, A.; Valverde, S.; Bernal, J.; Freixenet, J.; Oliver, A.; Lladó, X. Acute and sub-acute stroke lesion segmentation from multimodal MRI. *Comput. Methods Programs Biomed.* **2020**, *194*, 105521.
- [34] Soltanpour, M.; Greiner, R.; Boulanger, P.; Buck, B. Improvement of automatic ischemic stroke lesion segmentation in CT perfusion maps using a learned deep neural network. *Comput. Biol. Med.* **2021**, *137*, 104849.
- [35] Sheng, M.; Xu, W.; Yang, J.; Chen, Z. Cross-Attention and Deep Supervision UNet for Lesion Segmentation of Chronic Stroke. *Front. Neurosci.* **2022**, *16*, 836412.
- [40] Hui, H.; Zhang, X.; Wu, Z.; Li, F. Dual-path attention compensation U-Net for stroke lesion segmentation. *Comput. Intell. Neurosci.* **2021**, *2021*, 7552185.
- [41] Liu, X.; Yang, H.; Qi, K.; Dong, P.; Liu, Q.; Liu, X.; Wang, R.; Wang, S. MSDF-Net: Multi-scale deep fusion network for stroke lesion segmentation. *IEEE Access*, **2019**, *7*, 178486–178495.

- [42] Wu, Z.; Zhang, X.; Li, F.; Wang, S.; Huang, L.; Li, J. W-Net: A boundary-enhanced segmentation network for stroke lesions. *Expert Syst. Appl.* **2023**, *230*, 120637.
- [52] Anand, V.K.; Khened, M.; Alex, V.; Krishnamurthi, G. Fully automatic segmentation for ischemic stroke using CT perfusion maps. In *Brainlesion: Glioma, Multiple Sclerosis, Stroke and Traumatic Brain Injuries: 4th International Workshop, BrainLes 2018, Held in Conjunction with MICCAI 2018, Granada, Spain, 16 September 2018; Revised Selected Papers, Part I*; Springer International Publishing; pp. 328–334.
- [53] Cui, W.; Liu, Y.; Li, Y.; Guo, M.; Li, Y.; Li, X.; Wang, T.; Zeng, X.; Ye, C. Semi-supervised brain lesion segmentation with an adapted mean teacher model. In *Information Processing in Medical Imaging, Proceedings of the 26th International Conference, IPMI 2019, Hong Kong, China, 2–7 June 2019*; Proceedings 26; Springer International Publishing; pp. 554–565.
- [54] Karthik, R.; Gupta, U.; Jha, A.; Rajalakshmi, R.; Menaka, R. A deep supervised approach for ischemic lesion segmentation from multimodal MRI using Fully Convolutional Network. *Appl. Soft Comput.* **2019**, *84*, 105685.
- [55] Ahmad, P.; Jin, H.; Alroobaea, R.; Qamar, S.; Zheng, R.; Alnajjar, F.; Aboudi, F. MH UNet: A multi-scale hierarchical based architecture for medical image segmentation. *IEEE Access* **2021**, *9*, 148384–148408.
- [56] Tureckova, A.; Rodríguez-Sánchez, A.J. ISLES challenge: U-shaped convolutional neural network with dilated convolution for 3D stroke lesion segmentation. In *Brainlesion: Glioma, Multiple Sclerosis, Stroke and Traumatic Brain Injuries, Proceedings of the 4<sup>th</sup> International Workshop, BrainLes 2018, Held in Conjunction with MICCAI 2018, Granada, Spain, 16 September 2018; Revised Selected Papers, Part I*; Springer International Publishing; pp. 319–327.
- [64] Zhou, Y.; Huang, W.; Dong, P.; Xia, Y.; Wang, S. D-UNet: A dimension-fusion U shape network for chronic stroke lesion segmentation. *IEEE/ACM Trans. Comput. Biol. Bioinform.* **2019**, *18*, 940–950.
- [65] Dolz, J.; Ben Ayed, I.; Desrosiers, C. Dense multi-path U-Net for ischemic stroke lesion segmentation in multiple image modalities. In *Brainlesion: Glioma, Multiple Sclerosis, Stroke and Traumatic Brain Injuries, Proceedings of the 4th International Workshop, BrainLes 2018, Held in Conjunction with MICCAI 2018, Granada, Spain, 16 September 2018; Revised Selected Papers, Part I*; Springer International Publishing; pp. 271–282.
- [66] Wang, G.; Song, T.; Dong, Q.; Cui, M.; Huang, N.; Zhang, S. Automatic ischemic stroke lesion segmentation from computed tomography perfusion images by image synthesis and attention-based deep neural networks. *Med. Image Anal.* **2020**, *65*, 101787.

- [68] Ou, Y.; Yuan, Y.; Huang, X.; Wong, K.; Volpi, J.; Wang, J.Z.; Wong, S.T. Lambdaunet: 2.5D stroke lesion segmentation of diffusion-weighted MR images. In *Medical Image Computing and Computer Assisted Intervention — MICCAI 2021, Proceedings of the 24<sup>th</sup> International Conference, Strasbourg, France, 27 September–1 October 2021*; Proceedings, Part I; Springer International Publishing; pp. 731–741.
- [71] Liu, L.; Yang, S.; Meng, L.; Li, M.; Wang, J. Multi-scale deep convolutional neural network for stroke lesions segmentation on CT images. In *Brainlesion: Glioma, Multiple Sclerosis, Stroke and Traumatic Brain Injuries, Proceedings of the 4th International Workshop, BrainLes 2018, Held in Conjunction with MICCAI 2018, Granada, Spain, 16 September 2018*; Revised Selected Papers, Part I; Springer International Publishing; pp. 283–291.
- [73] Omarov, B.; Tursynova, A.; Postolache, O.; Gamry, K.; Batyrbekov, A.; Aldeshov, S.; Azhibekova, Z.; Nurtas, M.; Aliyeva, A.; Shiyapov, K. Modified UNet Model for Brain Stroke Lesion Segmentation on Computed Tomography Images. *Comput. Mater. Contin.* **2022**, *71*, 4701–4717.
- [76] Qi, K.; Yang, H.; Li, C.; Liu, Z.; Wang, M.; Liu, Q.; Wang, S. X-net: Brain stroke lesion segmentation based on depthwise separable convolution and long-range dependencies. In *Medical Image Computing and Computer Assisted Intervention — Proceedings of the MICCAI 2019: 22nd International Conference, Shenzhen, China, 13–17 October 2019*; Proceedings, Part III; Springer International Publishing; pp. 247–255.
- [77] Wu, Z.; Zhang, X.; Li, F.; Wang, S.; Huang, L. Multi-scale long-range interactive and regional attention network for stroke lesion segmentation. *Comput. Electr. Eng.* **2022**, *103*, 108345.
- [78] Karthik, R.; Menaka, R.; Hariharan, M.; Won, D. Ischemic lesion segmentation using ensemble of multi-scale region aligned CNN. *Comput. Methods Programs Biomed.* **2021**, *200*, 105831.
- [79] Liu, Z.; Cao, C.; Ding, S.; Liu, Z.; Han, T.; Liu, S. Towards clinical diagnosis: Automated stroke lesion segmentation on multi-spectral MR image using convolutional neural network. *IEEE Access* **2018**, *6*, 57006–57016.
- [80] Ou, Y.; Yuan, Y.; Huang, X.; Wong, S.T.; Volpi, J.; Wang, J.Z.; Wong, K. Patcher: Patch transformers with mixture of experts for precise medical image segmentation. In *Proceedings of the International Conference on Medical Image Computing and Computer-Assisted Intervention, Singapore, 18–22 September 2022*; Springer Nature Switzerland: Cham, Switzerland, 2022; pp. 475–484.

- [86] Zhao, B.; Liu, Z.; Liu, G.; Cao, C.; Jin, S.; Wu, H.; Ding, S. Deep learning-based acute ischemic stroke lesion segmentation method on multimodal MR images using a few fully labeled subjects. *Comput. Math. Methods Med.* **2021**, *2021*, 3628179.
- [89] Islam, M.; Vaidyanathan, N.R.; Jose, V.J.M.; Ren, H. Ischemic stroke lesion segmentation using adversarial learning. In *Brainlesion: Glioma, Multiple Sclerosis, Stroke and Traumatic Brain Injuries, Proceedings of the 4th International Workshop, BrainLes 2018, Held in Conjunction with MICCAI 2018, Granada, Spain, 16 September 2018; Revised Selected Papers, Part I*; Springer International Publishing, 292–300.
- [90] Ou, Y.; Huang, S.X.; Wong, K.K.; Cummock, J.; Volpi, J.; Wang, J.Z.; Wong, S.T. BBox-Guided Segmentor: Leveraging expert knowledge for accurate stroke lesion segmentation using weakly supervised bounding box prior. *Comput. Med. Imaging Graph.* **2023**, *107*, 102236.
- [91] Wang, S.; Chen, Z.; You, S.; Wang, B.; Shen, Y.; Lei, B. Brain stroke lesion segmentation using consistent perception generative adversarial network. *Neural Comput. Appl.* **2022**, *34*, 8657–8669
